# Supplementary material
Source: PubMed Central journal article supplement (PMC4432181)
Supplement: AAC.05142-14_zac006154062so1.pdf [file AAC.05142-14_zac006154062so1.pdf]

## Supporting Information

Profiling of  $\beta$ -Lactam Selectivity for Penicillin-Binding Proteins in *Streptococcus pneumoniae* D39

Ozden Kocaoglu,<sup>a,e</sup> Ho-Ching T. Tsui,<sup>b,e</sup> Malcolm E. Winkler,<sup>b</sup> and Erin E. Carlson<sup>a,c,d</sup>#

Departments of Molecular and Cellular Biochemistry,<sup>a</sup> Biology,<sup>b</sup> and Chemistry<sup>c</sup>

Indiana University, Bloomington, Indiana, USA

#Corresponding Author: [carlsone@umn.edu](mailto:carlsone@umn.edu)

### Supplemental Figures and Tables

FIG. S1. Structures of the  $\beta$ -lactam antibiotics used in this study.

FIG. S2. Representative SDS-PAGE gels for  $\beta$ -lactam titration of PBPs in *S. pneumoniae* IU1945.

FIG. S3. Representative SDS-PAGE gel for  $\beta$ -lactam titration of PBPs in *S. pneumoniae* IU6647.

FIG. S4. Graphs of PBP fluorescent gel-band quantitation.

FIG. S5. Gel-based analysis of mecillinam and 6-APA titrations in BHI broth.

FIG. S6. Inhibition of PBP2x activity with cefuroxime leads to elongation of *S. pneumoniae* cells.

TABLE S1. Inhibition of Boc-FL binding to PBPs in *S. pneumoniae* with a number of  $\beta$ -lactam antibiotics.

---

<sup>d</sup> Present Address: Department of Chemistry, University of Minnesota, 207 Pleasant St. SE, Minneapolis, MN 55455

<sup>e</sup> Equal contribution

TABLE S2. Inhibition of Boc-FL binding to PBP1b in *S. pneumoniae* IU1945 and IU6647 with amoxicillin, doripenem and meropenem.

**Monobactam**

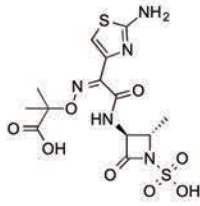

aztreonam

**Penem**

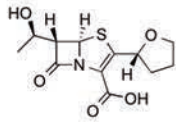

faropenem

**Carbapenem**

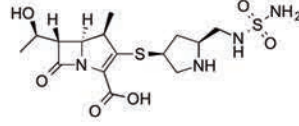

doripenem

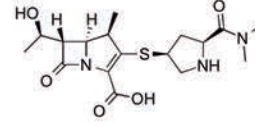

meropenem

**Penicillin**

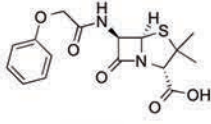

penicillin V

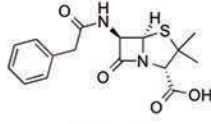

penicillin G

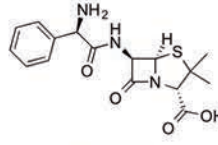

ampicillin

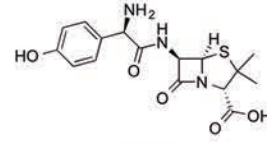

amoxicillin

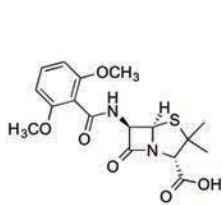

methicillin

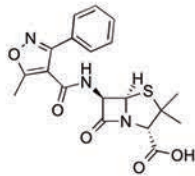

oxacillin

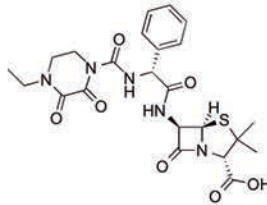

piperacillin

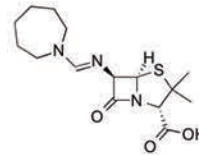

mecillinam

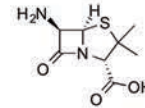

6-APA

**Cephalosporin**

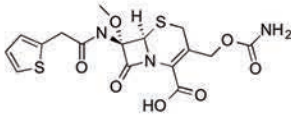

cefoxitin

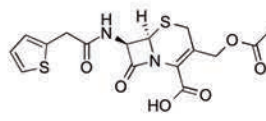

cephalothin

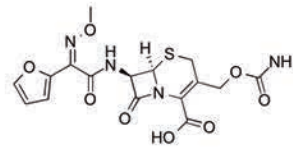

cefuroxime

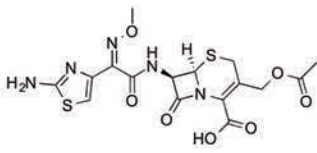

cefotaxime

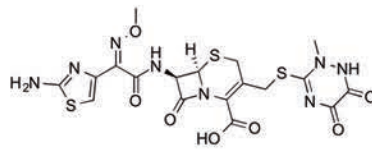

ceftriaxone

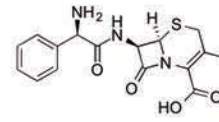

cephalexin

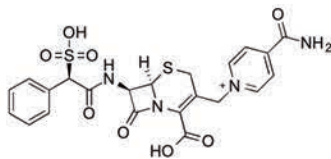

cefsulodin

FIG. S1. Structures of the  $\beta$ -lactam antibiotics used in this study.

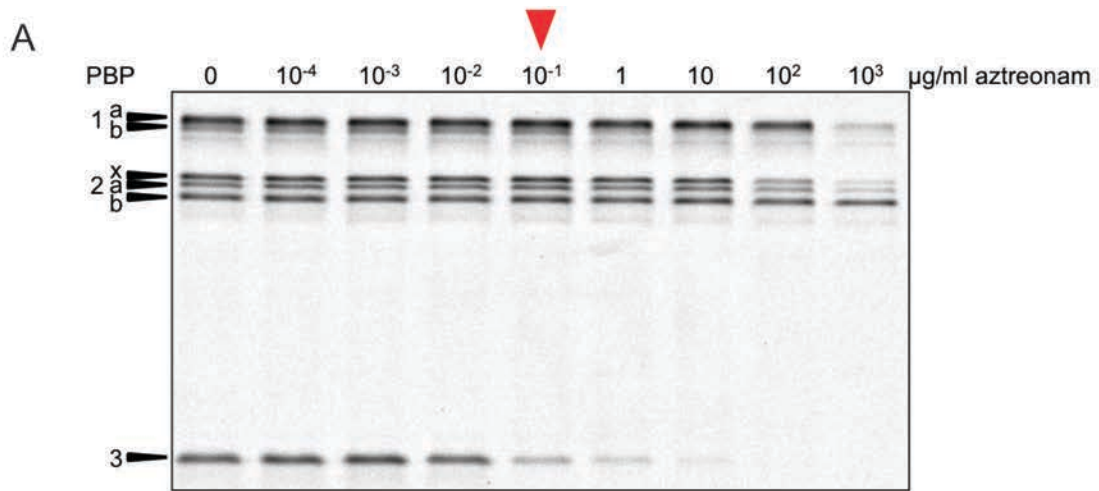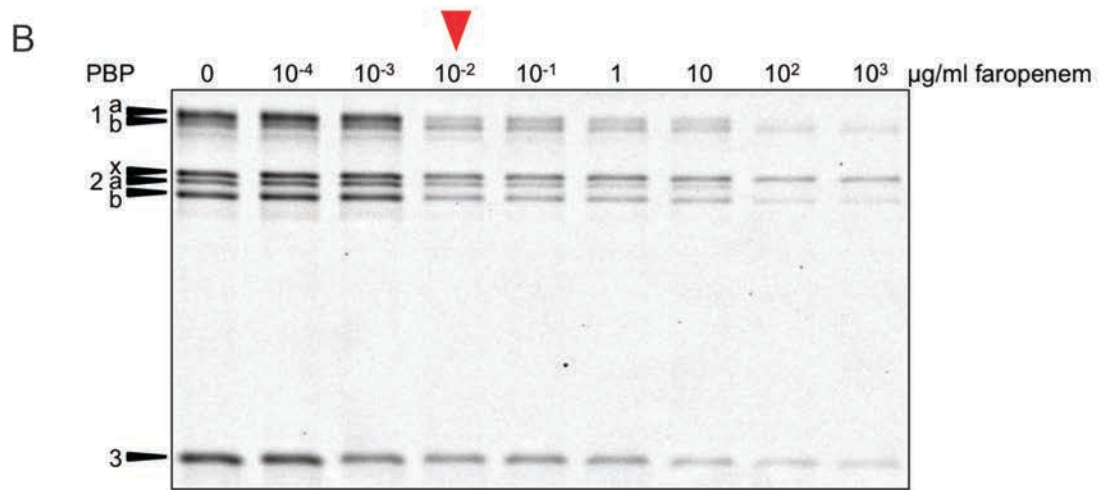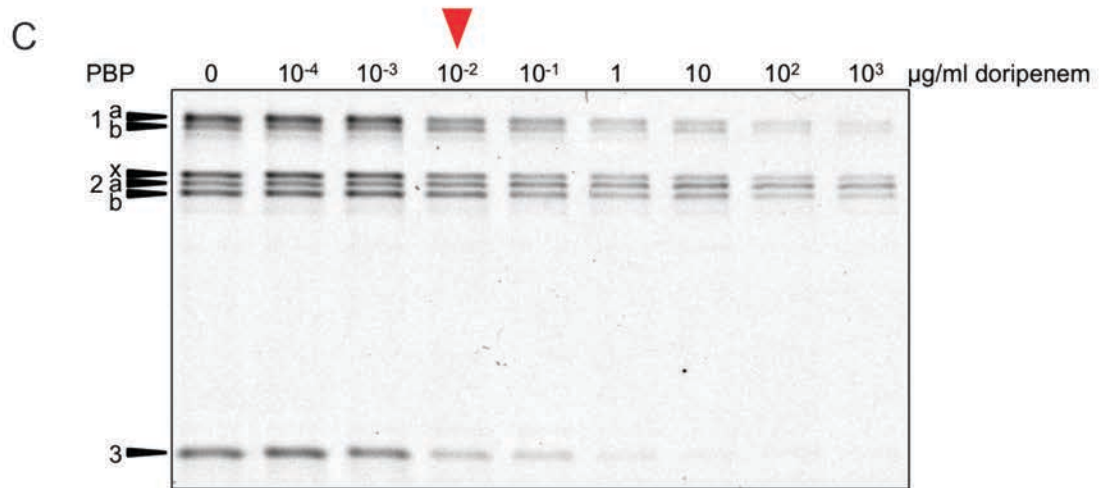

FIG. S2 (continued on next page)

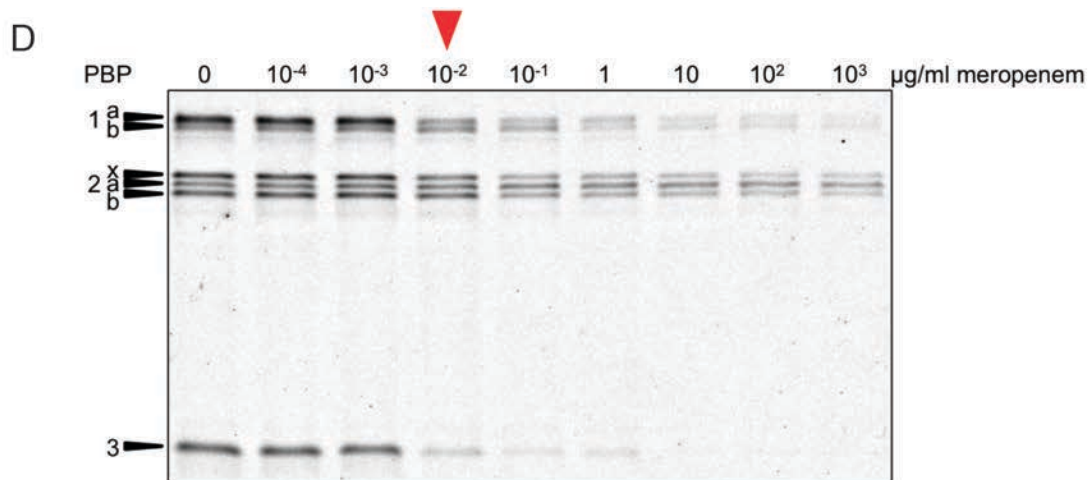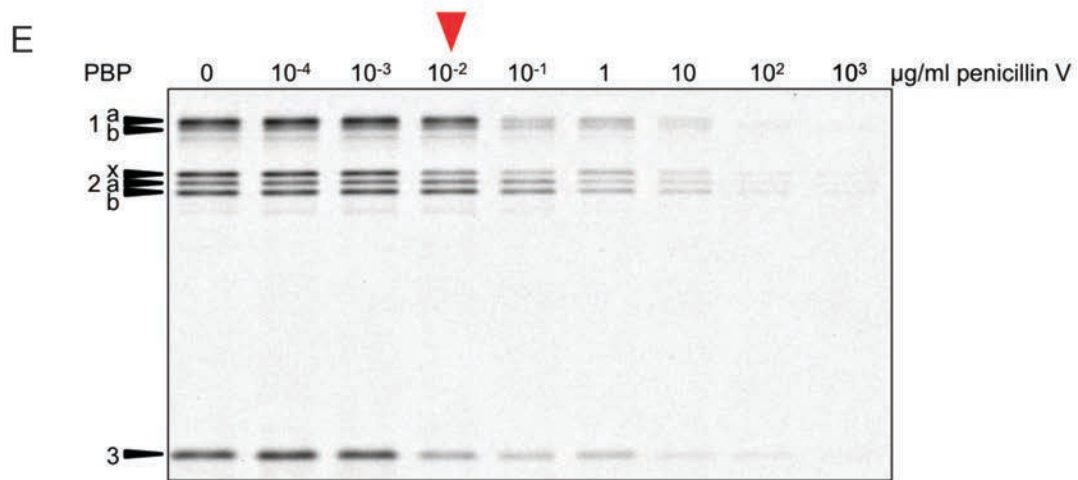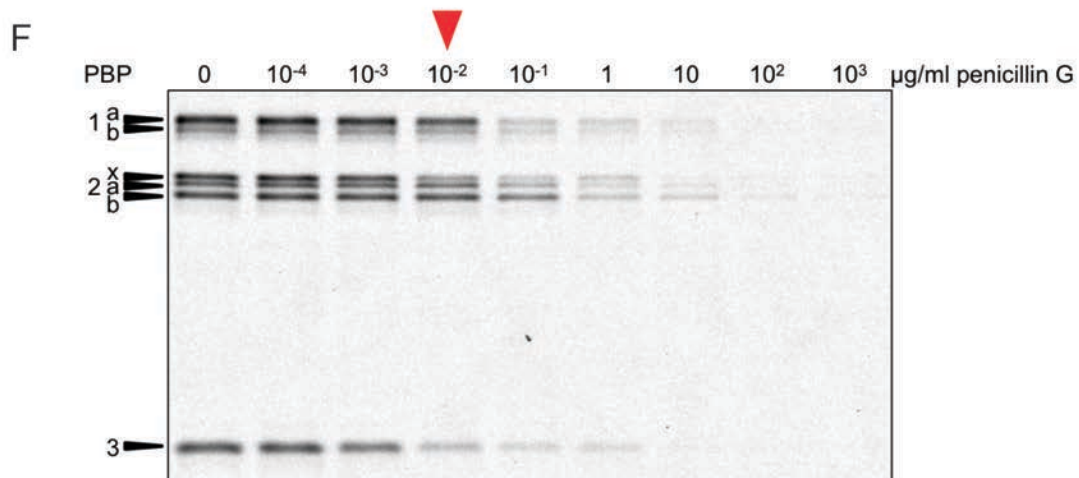

FIG. S2 (continued)

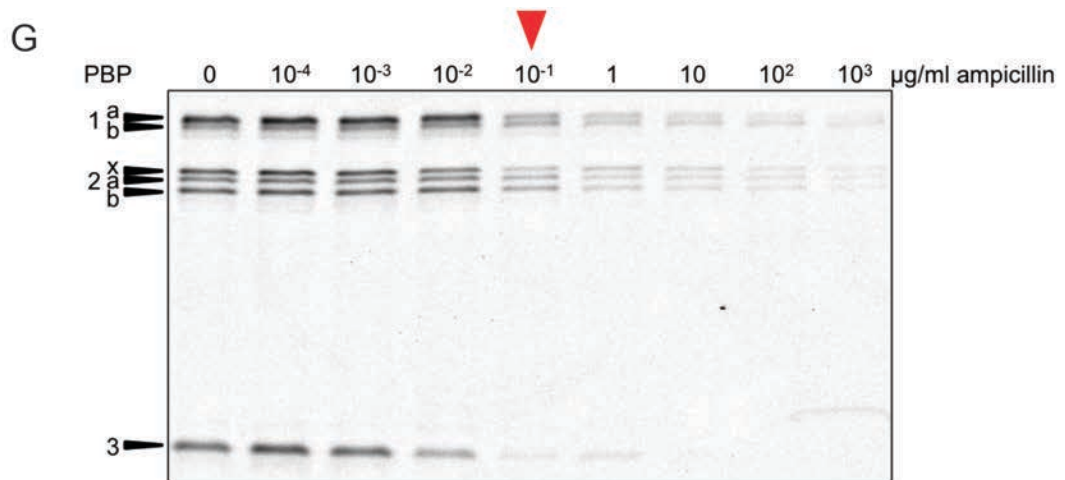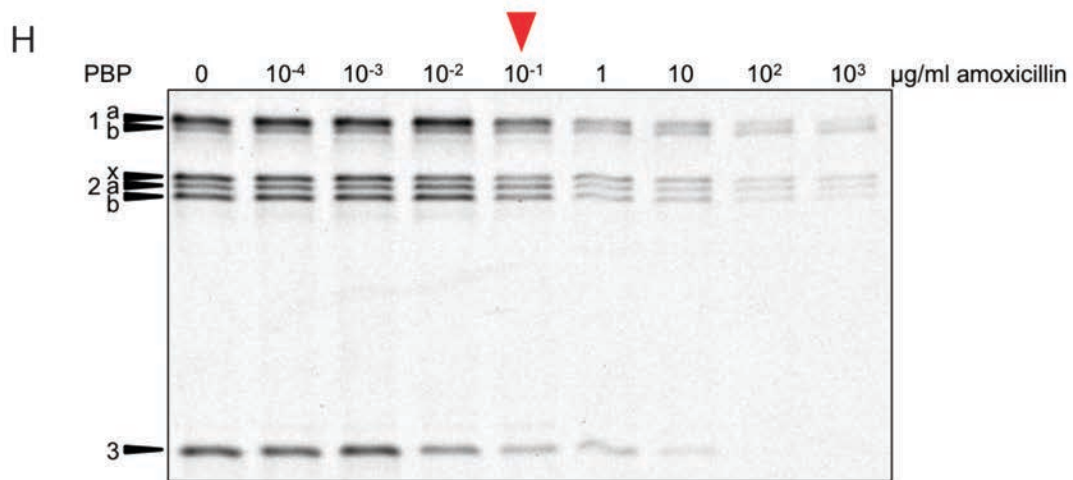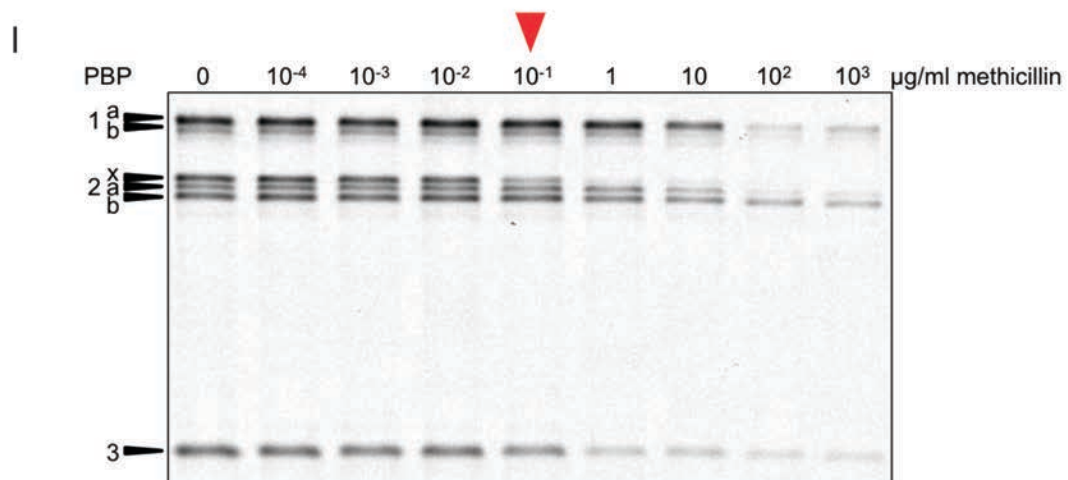

FIG. S2 (continued)



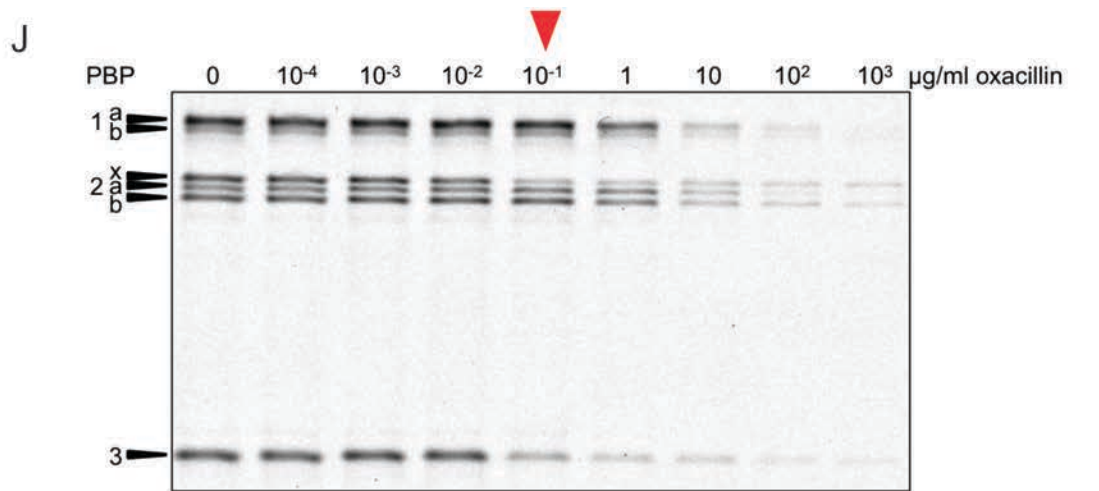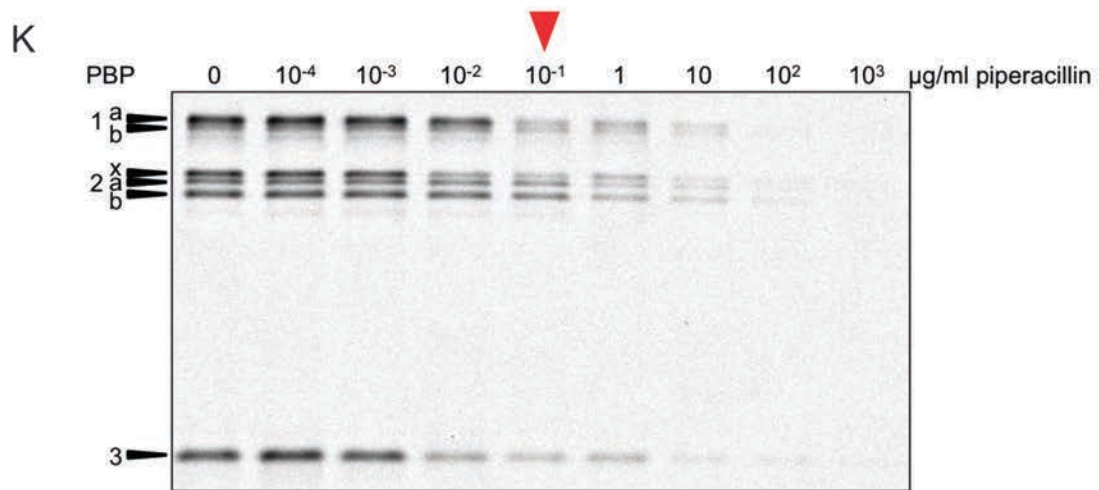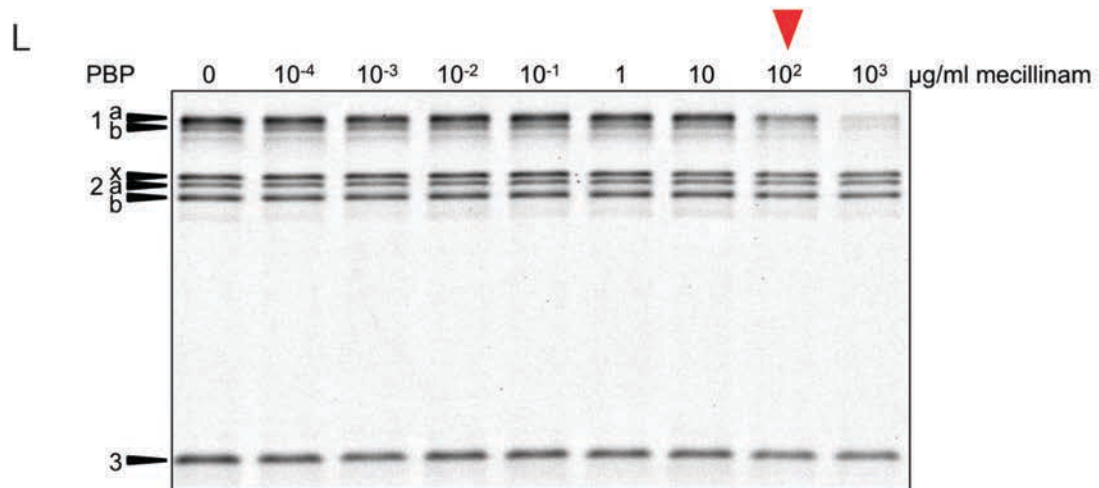

FIG. S2 (continued)

M

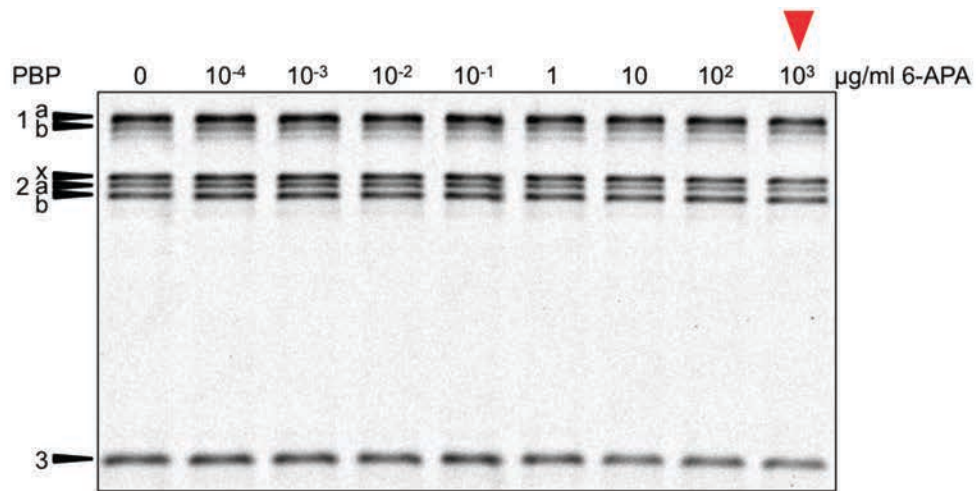

N

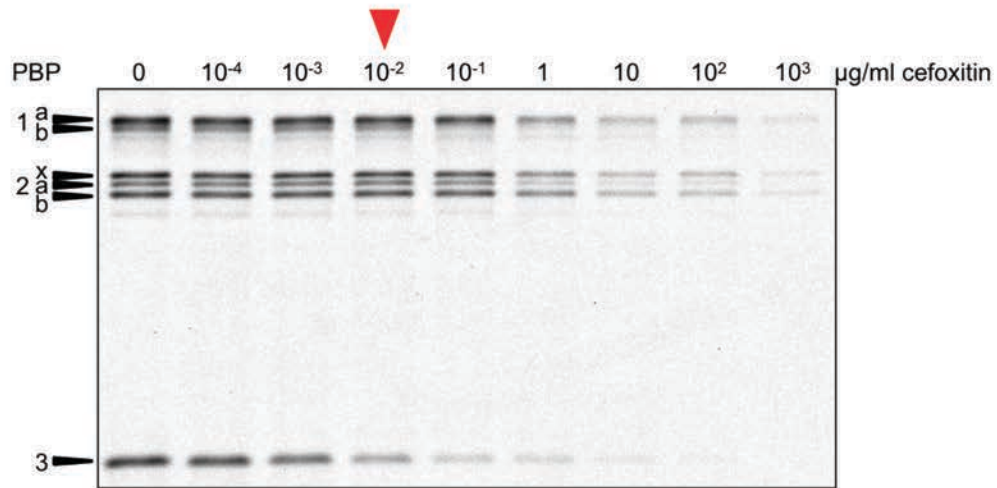

O

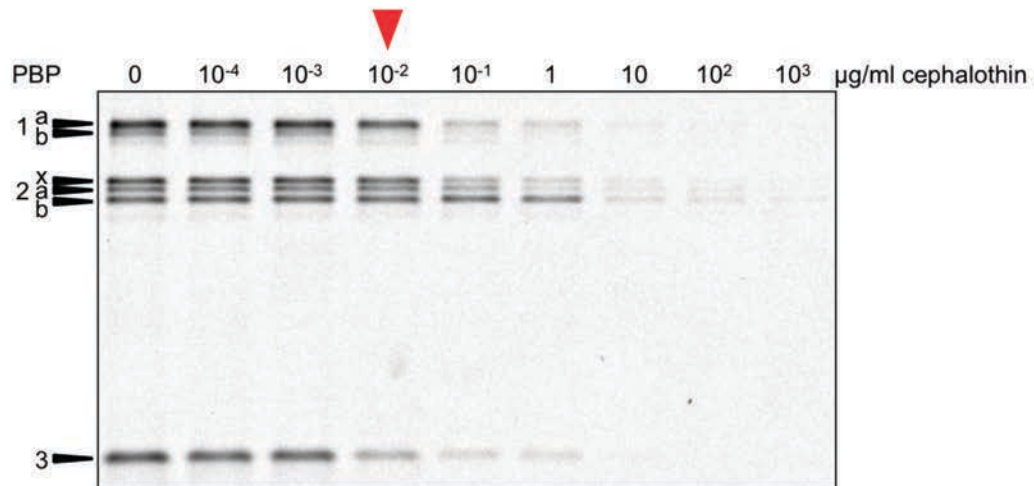

FIG. S2 (continued)



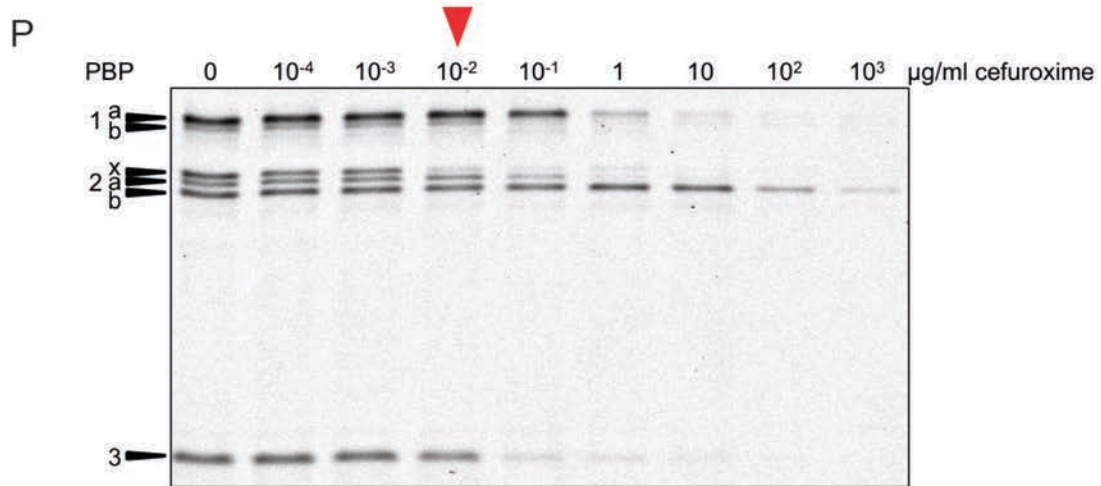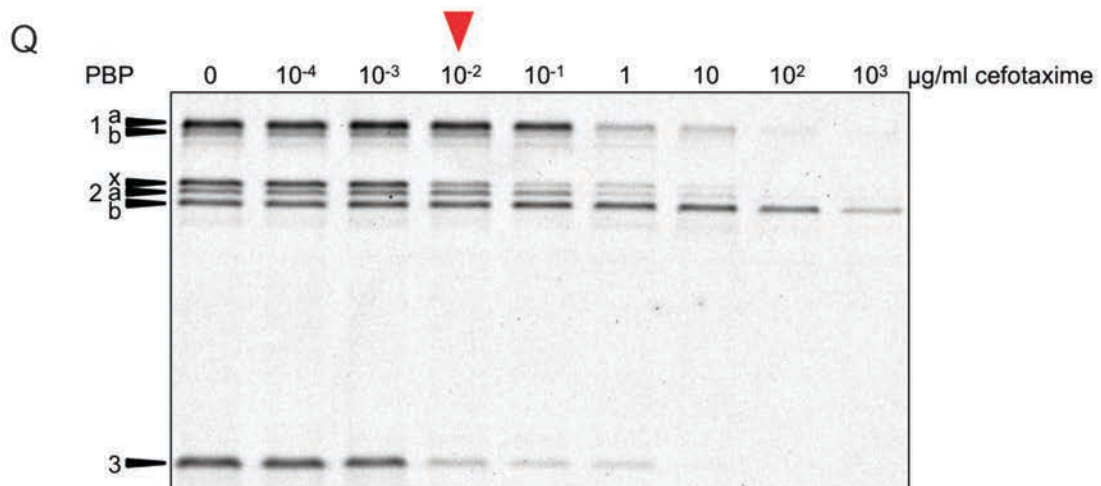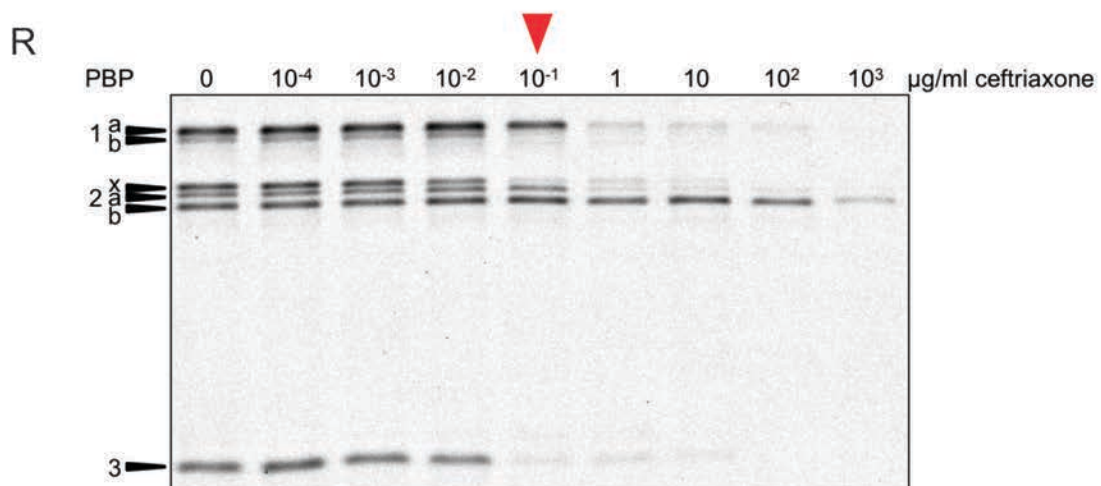

FIG. S2 (continued)

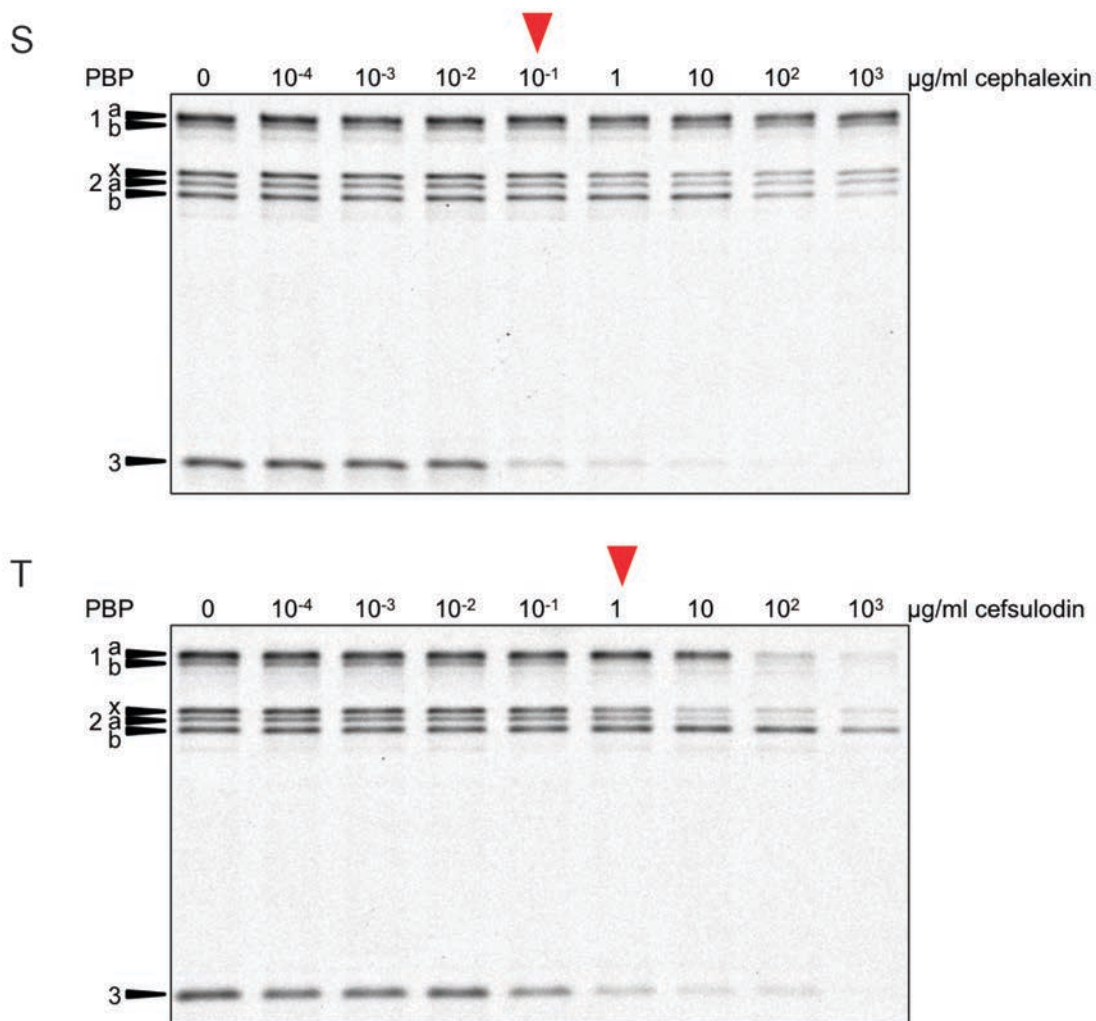

FIG. S2. Representative SDS-PAGE gels for  $\beta$ -lactam titration of PBPs in *S. pneumoniae* IU1945. Whole cells were treated with various concentrations of antibiotics and subsequently labeled with BOCILLIN FL (Boc-FL) (A) aztreonam, (B) faropenem, (C) doripenem, (D) meropenem, (E) penicillin V, (F) penicillin G, (G) ampicillin, (H) amoxicillin, (I) methicillin, (J) oxacillin, (K) piperacillin, (L) mecillinam, (M) (+)-6-Aminopenicillanic acid (6-APA), (N) ceftiofloxacin, (O) cephalothin, (P) cefuroxime, (Q) cefotaxime, (R) ceftriaxone, (S) cephalexin, (T) cefsulodin. Red arrow shows the lowest concentration of antibiotic that resulted in  $\leq 50\%$  Boc-FL labeling for at least one PBP.

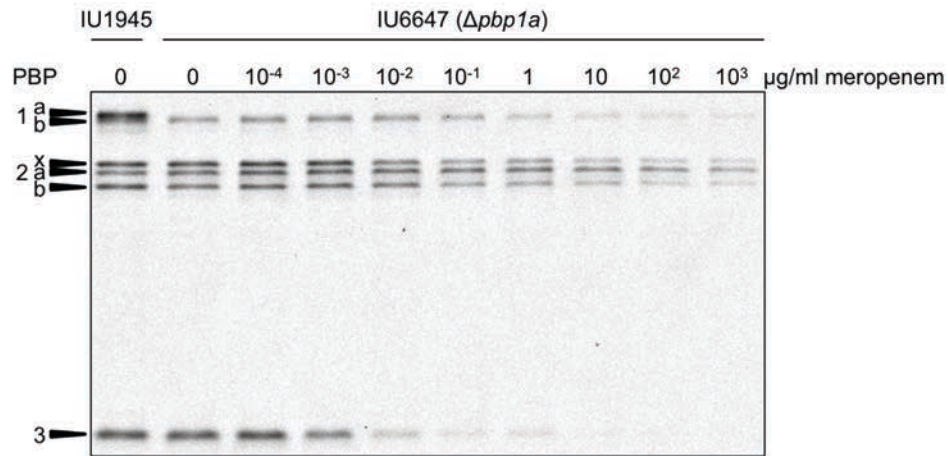

FIG. S3. Representative SDS-PAGE gel for  $\beta$ -lactam (meropenem) titration of PBPs in *S. pneumoniae* IU6647 (IU1945  $\Delta pbp1a::P-erm$ ).

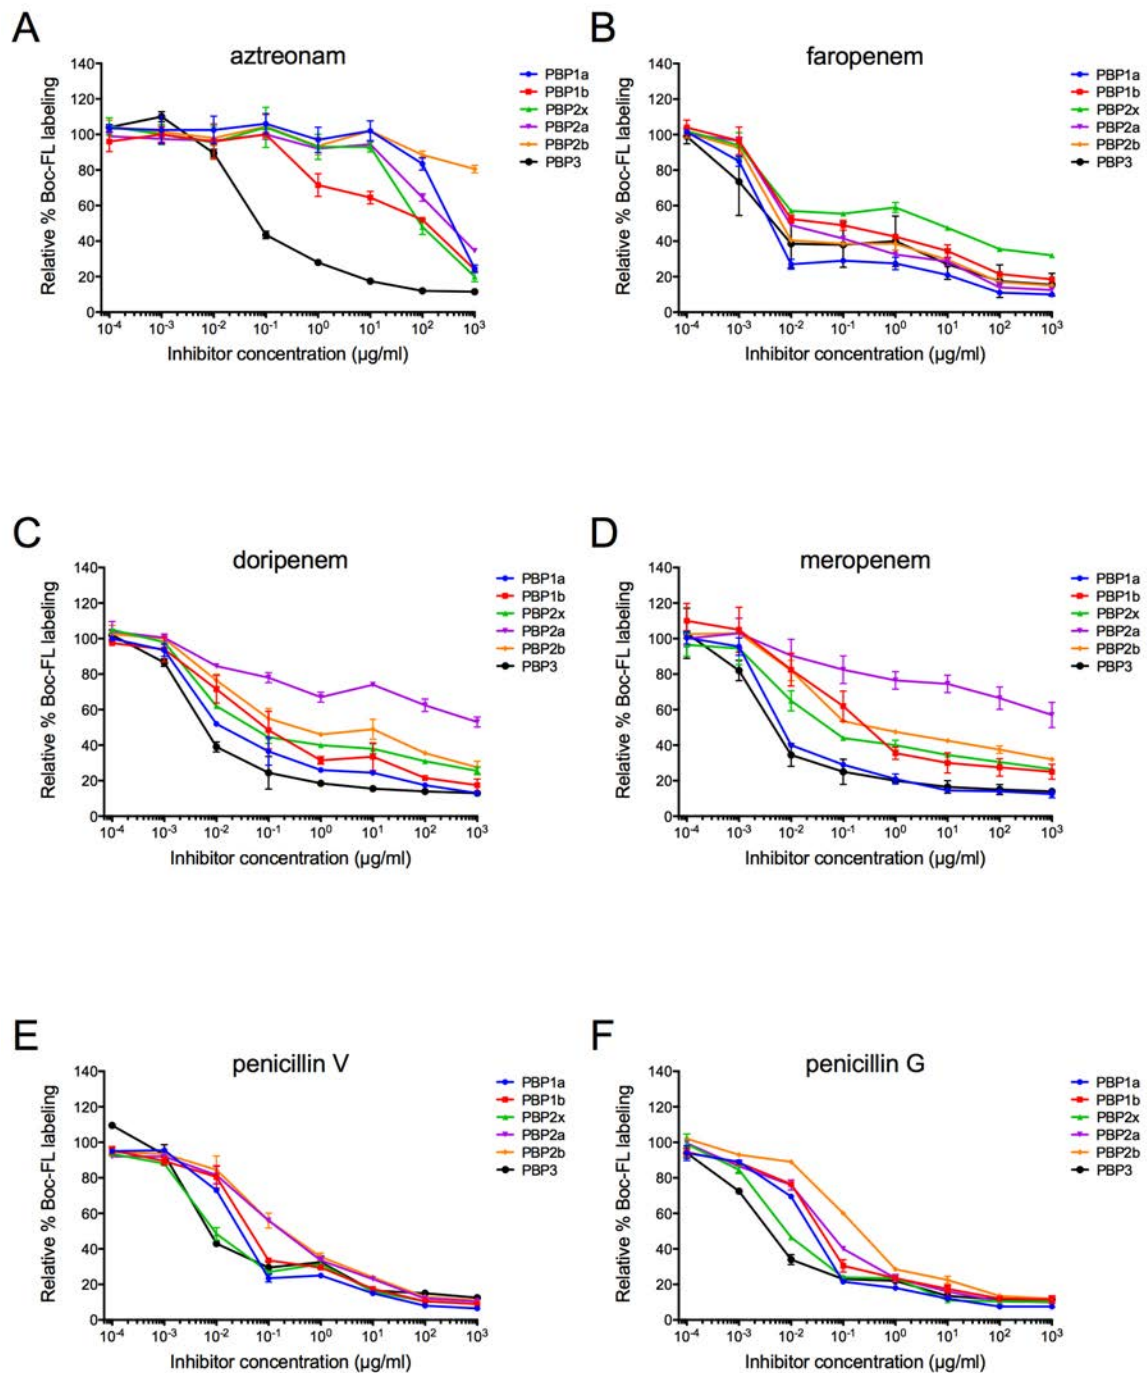

FIG. S4 (continued on next page)

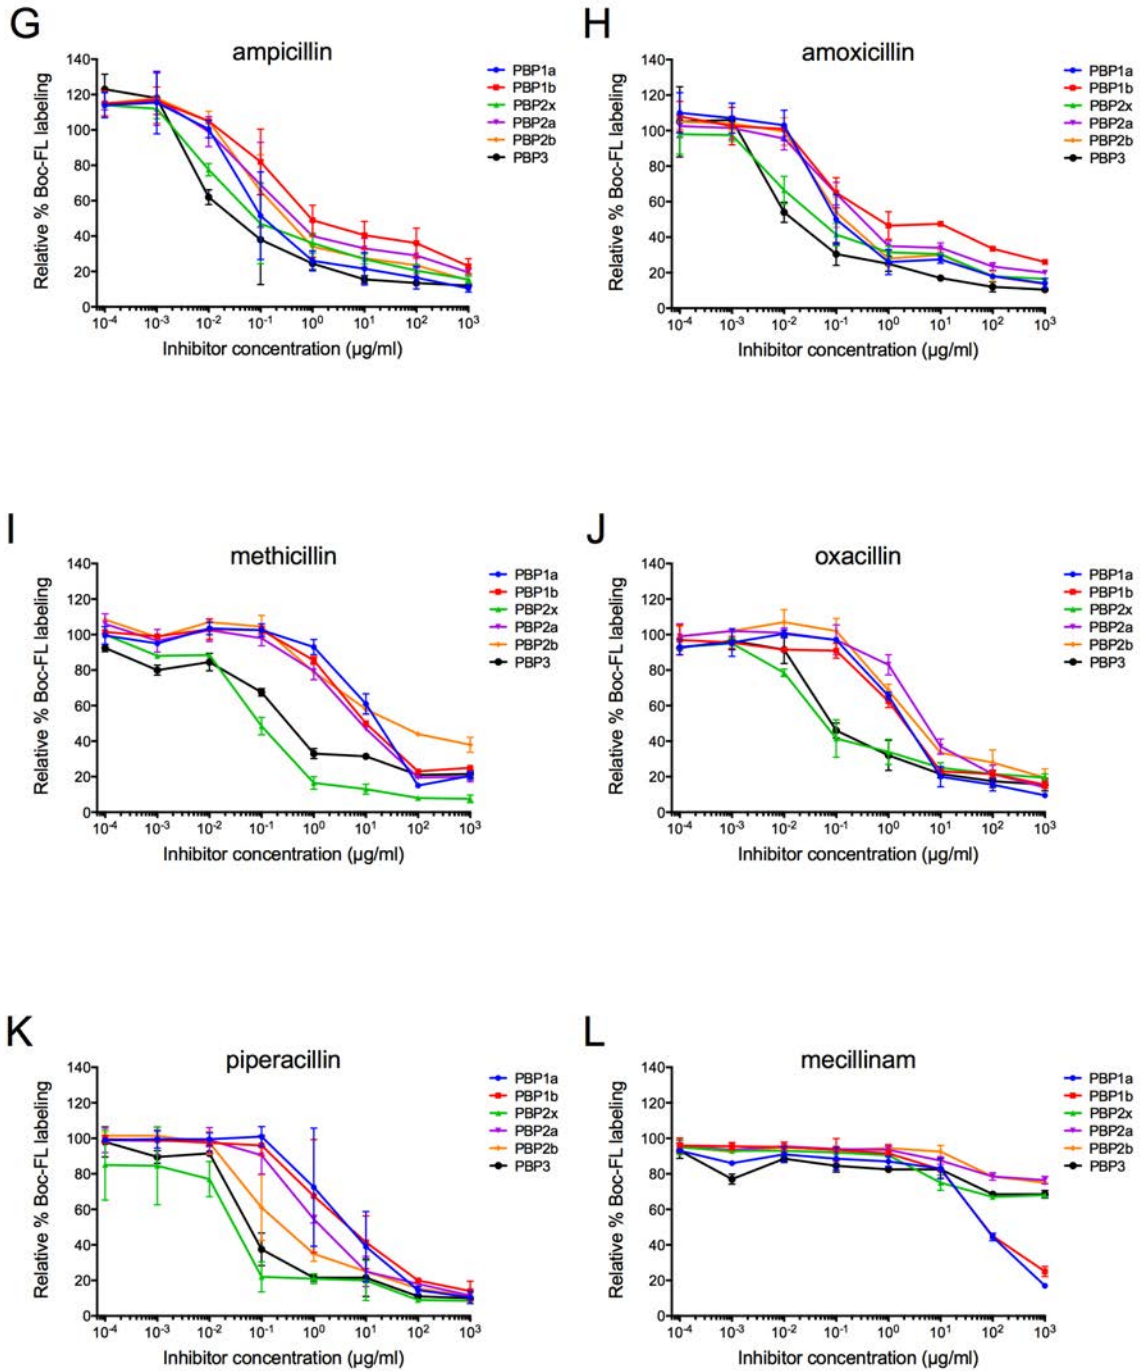

FIG. S4 (continued)



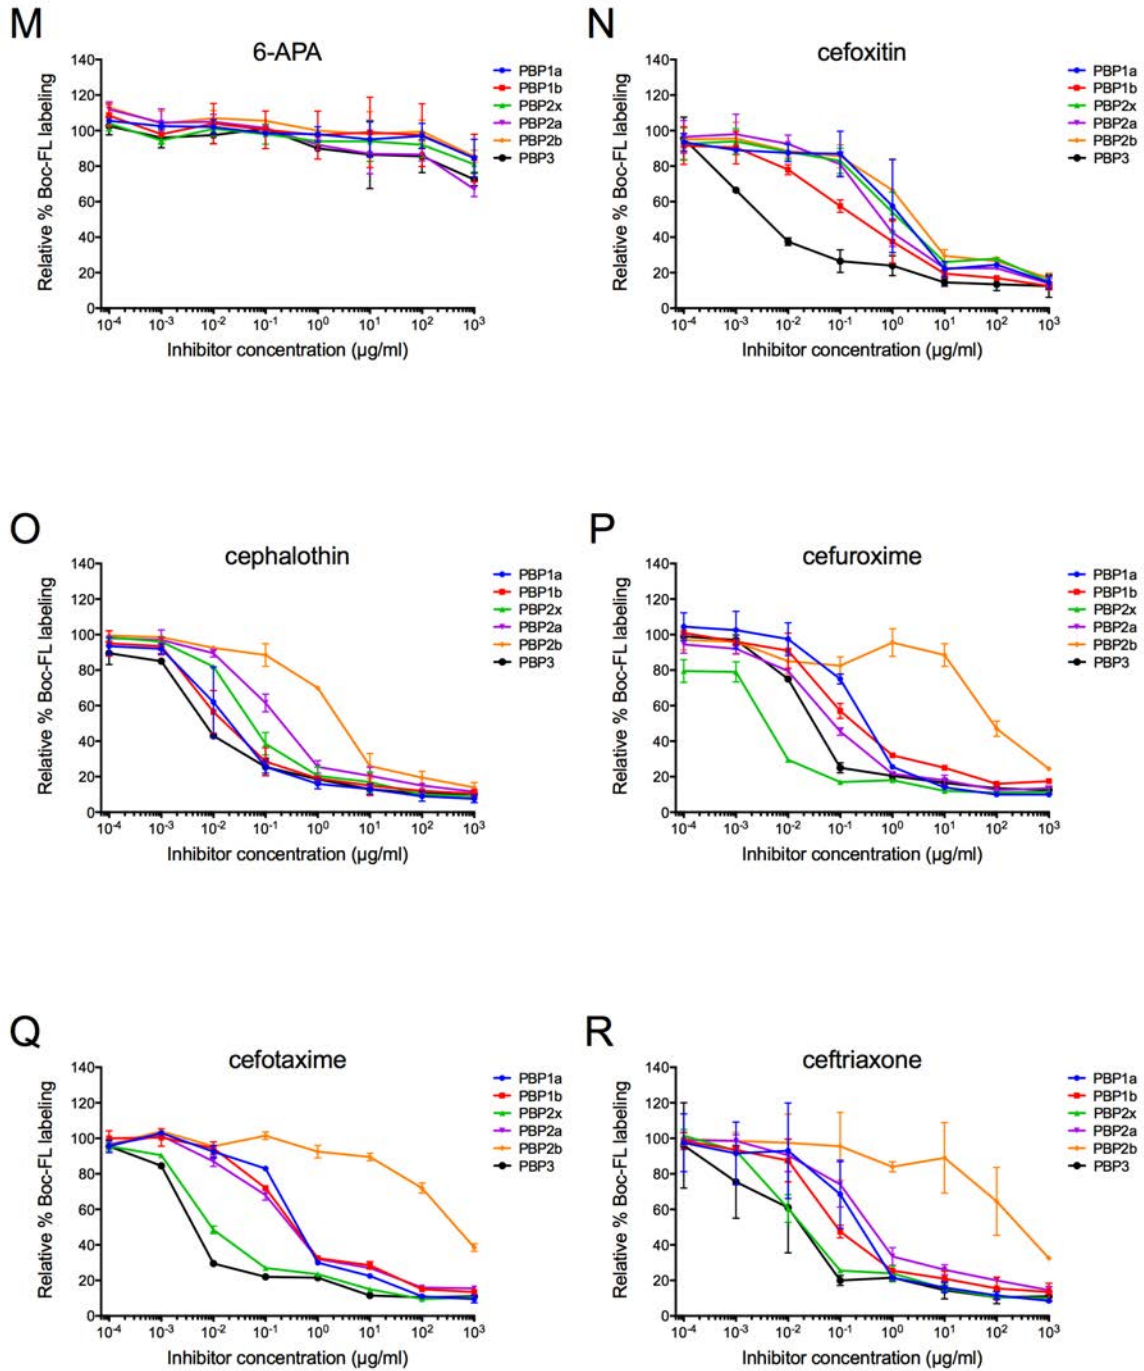

FIG. S4 (continued)



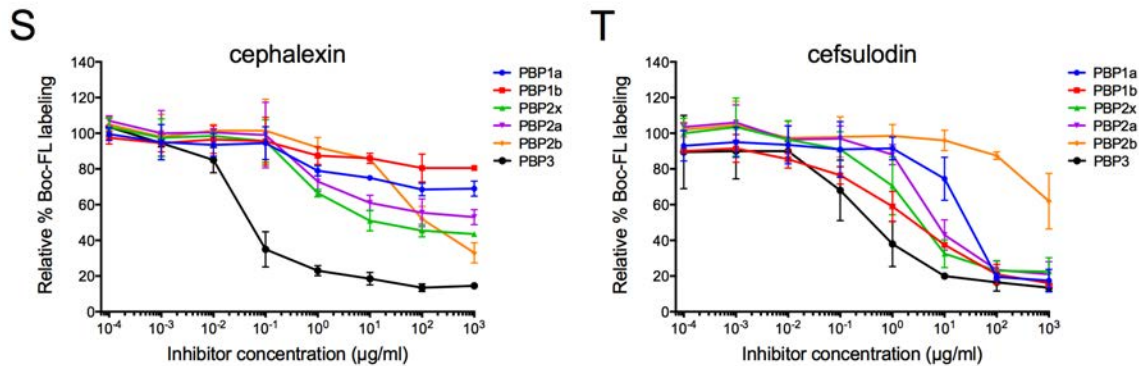

FIG. S4. Graphs of PBP fluorescent gel-band quantitation. (A) aztreonam (B) faropenem, (C) doripenem, (D) meropenem, (E) penicillin V, (F) penicillin G, (G) ampicillin, (H) amoxicillin, (I) methicillin, (J) oxacillin, (K) piperacillin, (L) mecillinam, (M) 6-APA, (N) ceftiofur, (O) cephalothin, (P) cefuroxime, (Q) cefotaxime, (R) ceftriaxone, (S) cephalalexin, (T) cefsulodin. Standard deviation from two independent experiments plotted.

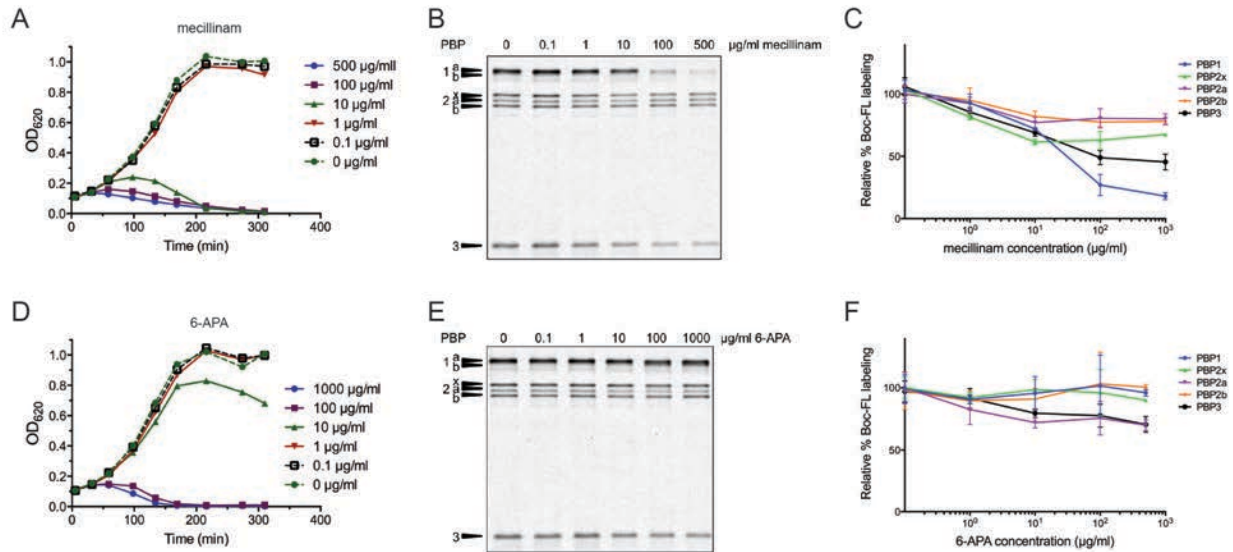

FIG. S5. Analysis of mecillinam and 6-APA titrations in BHI broth. Antibiotic titration in BHI and growth monitoring were performed as described previously (A. mecillinam, D. 6-APA) (1). Boc-FL labeling and SDS-PAGE gel analysis were performed as it was described in Materials and Methods (B, C. mecillinam, E, F. 6-APA). Antibiotic-treated cells, which were used for growth curves and Boc-FL labeling for gel-based analysis, were from the same culture tube.

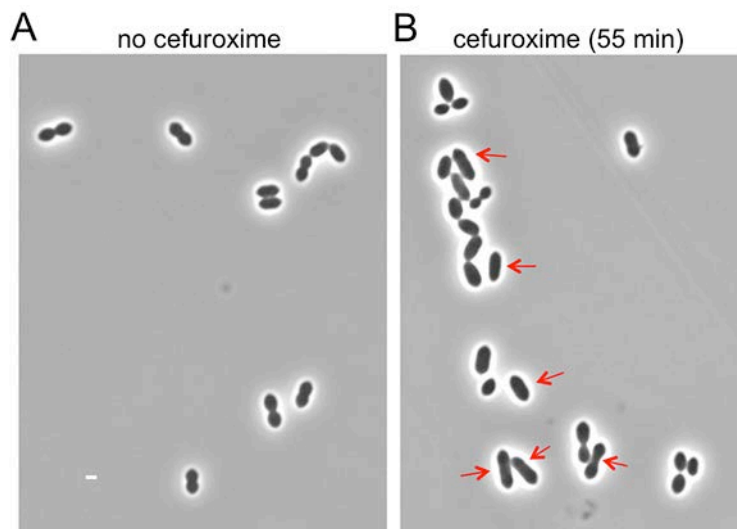

FIG. S6. Inhibition of PBP2x activity with cefuroxime leads to elongation of *S. pneumoniae* cells. Representative phase-contrast images of IU1945 with (A) no treatment or (B) 55 min after addition of cefuroxime at 0.006  $\mu\text{g/ml}$ . Arrows point to elongated cells in cefuroxime-treated cultures. Scale bar, 1  $\mu\text{m}$ . The experiment was performed twice with similar results.

TABLE S1 Inhibition of Boc-FL binding to PBPs in *S. pneumoniae* with a number of  $\beta$ -lactams

| $\beta$ -lactam | Concentration <sup>a</sup><br>( $\mu$ g/ml) | Relative % Boc-FL Labeling <sup>b</sup> |           |           |           |           |           |
|-----------------|---------------------------------------------|-----------------------------------------|-----------|-----------|-----------|-----------|-----------|
|                 |                                             | PBP1a                                   | PBP1b     | PBP2x     | PBP2a     | PBP2b     | PBP3      |
| Monobactam      |                                             |                                         |           |           |           |           |           |
| Aztreonam       | 0.1                                         | 106                                     | 100       | 104       | 100       | 105       | <b>43</b> |
| Penem           |                                             |                                         |           |           |           |           |           |
| Faropenem       | 0.01                                        | <b>27</b>                               | 52        | 57        | <b>49</b> | <b>40</b> | <b>48</b> |
| Carbapenem      |                                             |                                         |           |           |           |           |           |
| Doripenem       | 0.01                                        | 52                                      | 72        | 62        | 85        | 77        | <b>39</b> |
| Meropenem       | 0.01                                        | <b>40</b>                               | 83        | 65        | 91        | 82        | <b>35</b> |
| Penicillin      |                                             |                                         |           |           |           |           |           |
| Penicillin V    | 0.01                                        | 73                                      | 81        | <b>48</b> | 81        | 84        | <b>43</b> |
| Penicillin G    | 0.01                                        | 70                                      | 76        | <b>47</b> | 76        | 89        | <b>34</b> |
| Ampicillin      | 0.1                                         | 52                                      | 82        | <b>47</b> | 69        | 65        | <b>38</b> |
| Amoxicillin     | 0.1                                         | <b>50</b>                               | 65        | <b>41</b> | 64        | 54        | <b>31</b> |
| Methicillin     | 0.1                                         | 102                                     | 103       | <b>48</b> | 98        | 105       | 67        |
| Oxacillin       | 0.1                                         | 97                                      | 91        | <b>42</b> | 97        | 102       | <b>46</b> |
| Piperacillin    | 0.1                                         | 101                                     | 96        | <b>22</b> | 90        | 61        | <b>38</b> |
| Mecillinam      | 100                                         | <b>45</b>                               | <b>45</b> | 67        | 78        | 78        | 68        |
| 6-APA           | 1000                                        | 85                                      | 84        | 81        | 67        | 85        | 72        |
| Cephalosporin   |                                             |                                         |           |           |           |           |           |
| Cefoxitin       | 0.01                                        | 88                                      | 78        | 88        | 92        | 89        | <b>38</b> |
| Cephalothin     | 0.01                                        | 74                                      | 56        | 82        | 90        | 93        | <b>43</b> |
| Cefuroxime      | 0.01                                        | 97                                      | 91        | <b>30</b> | 79        | 85        | 75        |
| Cefotaxime      | 0.01                                        | 92                                      | 94        | <b>49</b> | 87        | 96        | <b>30</b> |
| Ceftriaxone     | 0.1                                         | 68                                      | <b>48</b> | <b>26</b> | 74        | 96        | <b>20</b> |
| Cephalexin      | 0.1                                         | 95                                      | 96        | 96        | 99        | 101       | <b>35</b> |
| Cefsulodin      | 1                                           | 91                                      | 59        | 71        | 88        | 99        | <b>38</b> |

<sup>a</sup> Concentration of antibiotic required to reduce the subsequent labeling of Boc-FL to  $\leq 50\%$  for at least one PBP.

<sup>b</sup> Inhibition of  $\geq 50\%$  of Boc-FL labeling is indicated by bolded text. Average of two independent experiments.

TABLE S2 Inhibition of Boc-FL binding to PBP1b in *S. pneumoniae* IU6647 (IU1945  $\Delta$ *pbp1a*::P-*erm*) and IU1945 with amoxicillin (AMX), doripenem (DOR) and meropenem (MEM).

| Concentration<br>( $\mu$ g/ml)                | Relative % Boc-FL Labeling   |                         |                                  |                                |                         |                                  |                                |                         |                                  |
|-----------------------------------------------|------------------------------|-------------------------|----------------------------------|--------------------------------|-------------------------|----------------------------------|--------------------------------|-------------------------|----------------------------------|
|                                               | AMX<br>(WT,<br>trial 1)      | AMX<br>(WT,<br>trial 2) | AMX<br>( $\Delta$ <i>pbp1a</i> ) | DOR<br>(WT,<br>trial 1)        | DOR<br>(WT,<br>trial 2) | DOR<br>( $\Delta$ <i>pbp1a</i> ) | MEM<br>(WT,<br>trial 1)        | MEM<br>(WT,<br>trial 2) | MEM<br>( $\Delta$ <i>pbp1a</i> ) |
| 0                                             | 100                          | 100                     | 100                              | 100                            | 100                     | 100                              | 100                            | 100                     | 100                              |
| $10^{-4}$                                     | 114                          | 102                     | 95                               | 98                             | 97                      | 87                               | 103                            | 117                     | 105                              |
| $10^{-3}$                                     | 110                          | 95                      | 102                              | 99                             | 89                      | 91                               | 96                             | 114                     | 102                              |
| $10^{-2}$                                     | 100                          | 102                     | 89                               | 77                             | 66                      | 91                               | 76                             | 89                      | 100                              |
| $10^{-1}$                                     | 59                           | 71                      | 72                               | 56                             | 41                      | 62                               | 56                             | 68                      | 75                               |
| $10^0$                                        | 41                           | 52                      | 58                               | 33                             | 30                      | 48                               | 33                             | 38                      | 58                               |
| $10^1$                                        | 48                           | 47                      | 52                               | 39                             | 28                      | 40                               | 26                             | 34                      | 47                               |
| $10^2$                                        | 33                           | 34                      | 50                               | 21                             | 22                      | 33                               | 24                             | 31                      | 46                               |
| $10^3$                                        | 25                           | 27                      | 38                               | 20                             | 15                      | 30                               | 22                             | 28                      | 39                               |
| <b>IC<sub>50</sub> (<math>\mu</math>g/ml)</b> | <b>0.054</b>                 | <b>0.28</b>             | <b>0.17</b>                      | <b>0.053</b>                   | <b>0.017</b>            | <b>0.14</b>                      | <b>0.046</b>                   | <b>0.071</b>            | <b>0.13</b>                      |
|                                               | Average = 0.17 $\pm$<br>0.12 |                         |                                  | Average = 0.035 $\pm$<br>0.018 |                         |                                  | Average = 0.059 $\pm$<br>0.012 |                         |                                  |

## REFERENCES

1. Land AD, Tsui HC, Kocaoglu O, Vella SA, Shaw SL, Keen SK, Sham LT, Carlson EE, Winkler ME. 2013. Requirement of essential Pbp2x and GpsB for septal ring closure in *Streptococcus pneumoniae* D39. *Molec Microbiol* **90**:939-955.
